# Supplementary material for: Systematic Review on Optical Diagnosis of Early Gastrointestinal Neoplasia
Source: MDPI journal article supplement (doi:10.3390/jcm10132794), 2021-06-25
Supplement: s1 [file s1]

**Supplementary Table S1. Systematization of search terms.** The search terms were subdivided according to the PICOS scheme

| Category                | Search terms                                                                                                                                                                                                                                            |
|-------------------------|---------------------------------------------------------------------------------------------------------------------------------------------------------------------------------------------------------------------------------------------------------|
| <b>Population (P)</b>   | Gastrointestinal cancer, characterization                                                                                                                                                                                                               |
| <b>Intervention (I)</b> | Gastrointestinal endoscopy,<br>image enhanced endoscopy, magnification, Narrow Band Imaging /<br>methods*,<br>image Interpretation, computer-Assisted / methods<br>precancerous Conditions / diagnostic imaging, Adenocarcinoma /<br>diagnostic imaging |
| <b>Comparisons (C)</b>  | Observer Variation, Predictive Value of Tests,<br>reproducibility of Results                                                                                                                                                                            |
| <b>Outcomes (O)</b>     | Endpoint, outcome, criteria                                                                                                                                                                                                                             |
| <b>Study designs</b>    | Prospective, meta-analysis                                                                                                                                                                                                                              |

**Supplementary Table S2. Systematic literature search in MEDLINE on the primary research question "With what statistical accuracy can GN be characterized visually-endoscopically?".** The numbers behind the diamond symbol refer to the steps in the search history. Query on 05/27/2021.

| Aspects of the search | Aspect 1                                                                              | Aspect 2                                                               | Aspect 3                                  | Other aspects, containment/filter | Number of results | Results after critical review of abstracts (incl. references) |
|-----------------------|---------------------------------------------------------------------------------------|------------------------------------------------------------------------|-------------------------------------------|-----------------------------------|-------------------|---------------------------------------------------------------|
| <b>MeSH-term(s)</b>   | <b>#1:</b> Early Detection of Cancer (Cancer Early Detection, Cancer Early Diagnosis) | ("diagnosis"[Mesh] OR "diagnostic imaging"[Mesh] OR "pathology"[Mesh]) | "endoscopy, gastrointestinal"[MeSH Terms] |                                   | 4.183             |                                                               |
| <b>Text words</b>     | <b>#2:</b> Early Cancer*[tw] AND detect*[tw]                                          |                                                                        | gastrointest*[tw] AND endoscop*[tw]       |                                   | 114               |                                                               |
| <b>Final result</b>   | <b>Search #1 OR #12 *</b>                                                             |                                                                        |                                           |                                   | 254               | 21                                                            |

\* (("search"[All Fields] OR "searched"[All Fields] OR "searches"[All Fields] OR "searching"[All Fields] OR "searchs"[All Fields]) AND (("early detection of cancer"[MeSH Terms] OR ("Early"[All Fields] AND "detection"[All Fields] AND "cancer"[All Fields]) OR "early detection of cancer"[All Fields]) AND (("early detection of cancer"[MeSH Terms] OR ("Early"[All Fields] AND "detection"[All Fields] AND "cancer"[All Fields]) OR "early detection of cancer"[All Fields] OR ("cancer"[All Fields] AND "Early"[All Fields] AND "detection"[All Fields]) OR "cancer early detection"[All Fields]) AND ("early detection of cancer"[MeSH Terms] OR ("Early"[All Fields] AND "detection"[All Fields] AND "cancer"[All Fields]) OR "early detection of cancer"[All Fields] OR ("cancer"[All Fields] AND "Early"[All Fields] AND "diagnosis"[All Fields]) OR "cancer early diagnosis"[All Fields])) AND ("diagnosis"[MeSH Terms] OR "diagnostic imaging"[MeSH Terms] OR "pathology"[MeSH Terms]) AND "endoscopy, gastrointestinal"[MeSH Terms])) OR ("early cancer\*[Text Word] AND "detect\*[Text Word] AND ("gastrointest\*[Text Word] AND "endoscop\*[Text Word]))
